# Supplementary material for: Uterine Skeletonization in Modified Radical Hysterectomy for Deep Infiltrative Endometriosis: The SkeletonDIE Study
Source: Research Square preprint supplement (doi:10.21203/rs.3.rs-7098525/v1), 2025-09-25
Supplement: Supplementary file 1 [file 0152cf3f9be494c42185c043.docx]

| Category | Parameter | Value |
| --- | --- | --- |
| Demographics | Age (years), median | 41 (34−55) |
|  | BMI (kg/m²), median | 27.0 (18.2−41.1) |
| Surgical History | Previous Gynecological Surgery, n (%) | 22 (27.5%) |
|  | Previous Endometriosis Surgery, n (%) | 12 (5%) |
|  | -Laparoscopic Endometriosis Surgery, n (%) | 8 (10%) |
|  | -Laparotomy Endometriosis Surgery, n (%) | 4 (5%) |
|  | Previous Obstetric Surgery, n (%) | 28 (35%) |
| Pelvic pain Visual Analog  Scores (VAS) | Dysmenorrhea, mean | 8,6 |
|  | Dyspareunia, mean | 7,4 |
|  | Dyschezia, mean | 5,3 |
|  | Dysuria, mean | 4.1 |
|  | Chronic Pelvic Pain, n (%) | P |
| Fertility History | Patients with previous successful pregnancy, n (%) | 72 (90%) |
|  | Infertility present, n (%) | 8 (10%) |
| Hormone Therapy | Patients receiving hormone therapy (Dienogest, GnRh etc.) for endometriosis, n (%) |  |
|  | Yes | 65 (84.4%) |
|  | No | 15 (15.6%) |
| Medical Comorbidities | Medical Comorbidities (Hypertension, Diabetes Mellitus,Hypothyroidism) , n (%) |  |
|  | Yes | 18 (22.5%) |
|  | No | 62 (77.5%) |
| Tumour Markers | CA 125, mean | 75.6 U/mL (2.7-945) |
|  | CA 19-9, mean | 25.4 U/mL (2.0-218) |
| Uterus | Adenomyosis, n (%) | 71 (88.7%) |
|  | Cases with Accompanying Uterine Myomas, n (%) | 9 (11.2%) |
| Adnexa | Bilateral Endometrioma, n (%) | 41 (51.2%) |
|  | Unilateral Endometrioma, n (%) | 39 (48.7%) |
|  | Coexisting Tubo-Ovarian Abscess, n (%) | 3 (3.7%) |
| Endometrioma Size | Right Ovary Endometrioma size (cm), mean (n=58) | 5.8 (2-18) |
|  | Left Ovary Endometrioma size (cm), mean (n=62) | 5.1 (3-16) |
| Renal Hydronephrosis | Preoperative Renal Hydronephrosis, n (%) |  |
|  | Grade l, n (%) | 6 (7.5%) |
|  | Grade ll, n (%) | 4 (5%) |
|  | Grade lll, n (%) (underwent preoperative nephrostomy) | 1 (1.25%) |
