# Supplementary material for: Uterine Skeletonization in Modified Radical Hysterectomy for Deep Infiltrative Endometriosis: The SkeletonDIE Study
Source: Research Square preprint supplement (doi:10.21203/rs.3.rs-7098525/v1), 2025-09-25
Supplement: Supplementary file 2 [file 2776ee5edf74e017ecbfb2d4.docx]

| Grade | % | n | Details |
| --- | --- | --- | --- |
| I | 17.5 | 14 | Wound infection (*n = 2*) Pyrexia (n = 8)  Significant pain >24 h but <5 days (*n = 3*)  Acute transient urinary retention (*n = 1*) |
| II | 15.0 | 12 | Hemoglobin drop >3 g/l requiring transfusion (*n = 7*)  Deep Vein Thrombosis (*n = 1*)  Cystitis (*n = 3*)  Acute Partial Axonal Peroneal Neuropathy (*n = 1*) |
| III-b | 6.2 | 5 | Bowel Thermal Injury, Ureteral Stricture (*n = 1*) Cuff Abscess (*n = 1*)  Rectovaginal Fistula (*n = 1*)  Rectal Anastomotic Leakage (*n = 1*)  Vesicorectal Fistula (*n = 1*) |
| IV-a | 1.2 | 1 | Submassive Pulmonary Embolism (*n = 1*) |
