# Supplementary material for: Uterine Skeletonization in Modified Radical Hysterectomy for Deep Infiltrative Endometriosis: The SkeletonDIE Study
Source: Research Square preprint supplement (doi:10.21203/rs.3.rs-7098525/v1), 2025-09-25
Supplement: Supplementary file 3 [file c821066a81a81476fccf2d52.docx]

Table 4. List of Postoperative Serious Complications (Clavien–Dindo Grade> III)

|  | Age | Postoperative Date | Complication | Management | Clavien Dindo Classification |
| --- | --- | --- | --- | --- | --- |
| Case 1 | 41 | 8th day | Vesicorectal Fistula | Relaparotomy / Colostomy+Nephrostomy placement | IIIb |
| Case 2 | 40 | 18th day | Rectal Anastomotic Leakage | Colonoscopic clip application | IIIb |
| Case 3 | 40 | 1st day | Submassive Pulmonary Embolism | Catheter-guided thrombolysis of the pulmonary vessels by IR | IVa |
| Case 4 | 41 | 10th month | Rectovaginal Fistula | Colonoscopy/Robot Assisted Low -Anterior Rectum resection | IIIb |
| Case 5 | 44 | 6th day | Bowel Thermal Injury, Ureteral Stricture | Relaparotomy/ Colostomy/Nephrostomy | IIIb |
| Case 6 | 43 | 7th day | Cuff Abscess | Laparoscopic- Abscess Drainage/Antibiotherapy | IIIb |
| Case 7 | 53 | 6th month | Umbilical Hernia | Surgery recommended, patient refused | Not classified due to lack of intervention |

 IR: *Interventional Radiology*
