# Supplementary material for: Uterine Skeletonization in Modified Radical Hysterectomy for Deep Infiltrative Endometriosis: The SkeletonDIE Study
Source: Research Square preprint supplement (doi:10.21203/rs.3.rs-7098525/v1), 2025-09-25
Supplement: Supplementary file 4 [file f107f4f1c6017525a6fa1f87.docx]

| Surgical-associated procedures, n (%) | n = 80 |
| --- | --- |
| Length of surgery (minutes), mean | 287 (123–670) |
| Type C1 Modified Radical Hysterectomy | 28 (35%) |
| Type B Modified Radical Hysterectomy | 52 (65%) |
| Adhesiolysis of omentum or small bowel adhesions to the anterior-lateral abdominal wall, n (%) | 34 (42.5%) |
| Bilateral adnexectomy, n (%) | 75 (93.7%) |
| Dorsolateral Parametrium Excision | 63 (78.7%) |
| - Bilateral, n (% among patients with parametrial deep infiltrating endometriosis) | 12 (19%) |
| - Unilateral, n (% among patients with parametrial deep infiltrating endometriosis) | 51 (80 %) |
| Vaginal Nodule Excision, n (%) | 7 (8.7%) |
| Bilateral ureterolysis, n (%) | 69 (86.2%) |
| Prophylactic Double J Implementation, n (%) | 5 (6.2%) |
| Rectal resection-rectal shaving, n (%) | 31 (38.7%) |
| Cases utilizing electromechanical morcellation of uterus, n (%) | 3 (3.7%) |
| Rectal resection, n (%) | 16 (20%) |
| -Ultra-low anterior rectum resection | 1 (1.25%) |
| -Low-anterior rectum resection | 13 (16.2%) |
| -High-anterior rectum resection | 2 (2.5%) |
| -Laparoscopic rectum resection with Natural Orifice Specimen Extraction (NOSE), n (%) | 12 (75%) |
| -Laparoscopic Rectum Resection with mini Pfannenstiel, n (%) | 4 (25%) |
| Protective ileostomy, n (%) | 3 (3.7%) |
| Protestime colostomy, n (%) | 1 (1.2%) |

| Surgical AAGL score | AAGL 2021 score, mean | 55.3 (37−84) |
| --- | --- | --- |
| Surgical Enzian Classification | Compartment A |  |
|  | A1, n (%) | 4 (5%) |
|  | A2, n (%) | 59 (73.7%) |
|  | A3, n (%) | 16 (20%) |
|  | Compartment B (mono or bilateral) |  |
|  | B1, n (%) | 24 (30%) |
|  | B2, n (%) | 35 (43.7%) |
|  | B3, n (%) | 4 (5%) |
|  | Compartment C |  |
|  | C1, n (%) | 4 (5%) |
|  | C2, n (%) | 18 (22.5%) |
|  | C3, n (%) | 20 (25%) |
|  | Compartment F |  |
|  | FA, n (%) | 69 (86.2%) |
|  | FB, n (%) | 3 (3.75%) |
|  | FI, n (%) | 0 |
|  | FU, n (%) | 6 (7.5%) |
|  | F Vascular, n (%) | 1 (1.2%) |

| *Intraoperative complications, n (%)* | 3 (3.7%) |
| --- | --- |
| -Bladder Injury, n (%) | 2 (2.5%) |
| -Intraoperative bleeding (Internal Iliac Artery Injury) | 1 (1.25%) |
| Intraoperative patients blood transfused, n (%) | 8 (10%) |
| Postoperative patients blood transfused, n (%) | 9 (11.2%) |
| Hospital length of stay (days), mean | 6 (3–21) |
| Patients admitted to the intensive care unit (ICU), n (%) | 3 (3.75%) |
